# Supplementary figures and images for: Multiple myeloma is affected by multiple and heterogeneous somatic mutations in adhesion- and receptor tyrosine kinase signaling molecules
Source: PubMed Central journal article supplement — Blood Cancer J. 2013 Feb 8;3(2):e102–. doi: 10.1038/bcj.2012.47 (PMC3584721; doi:10.1038/bcj.2012.47), 2013-02-08

**S-Figure 1**

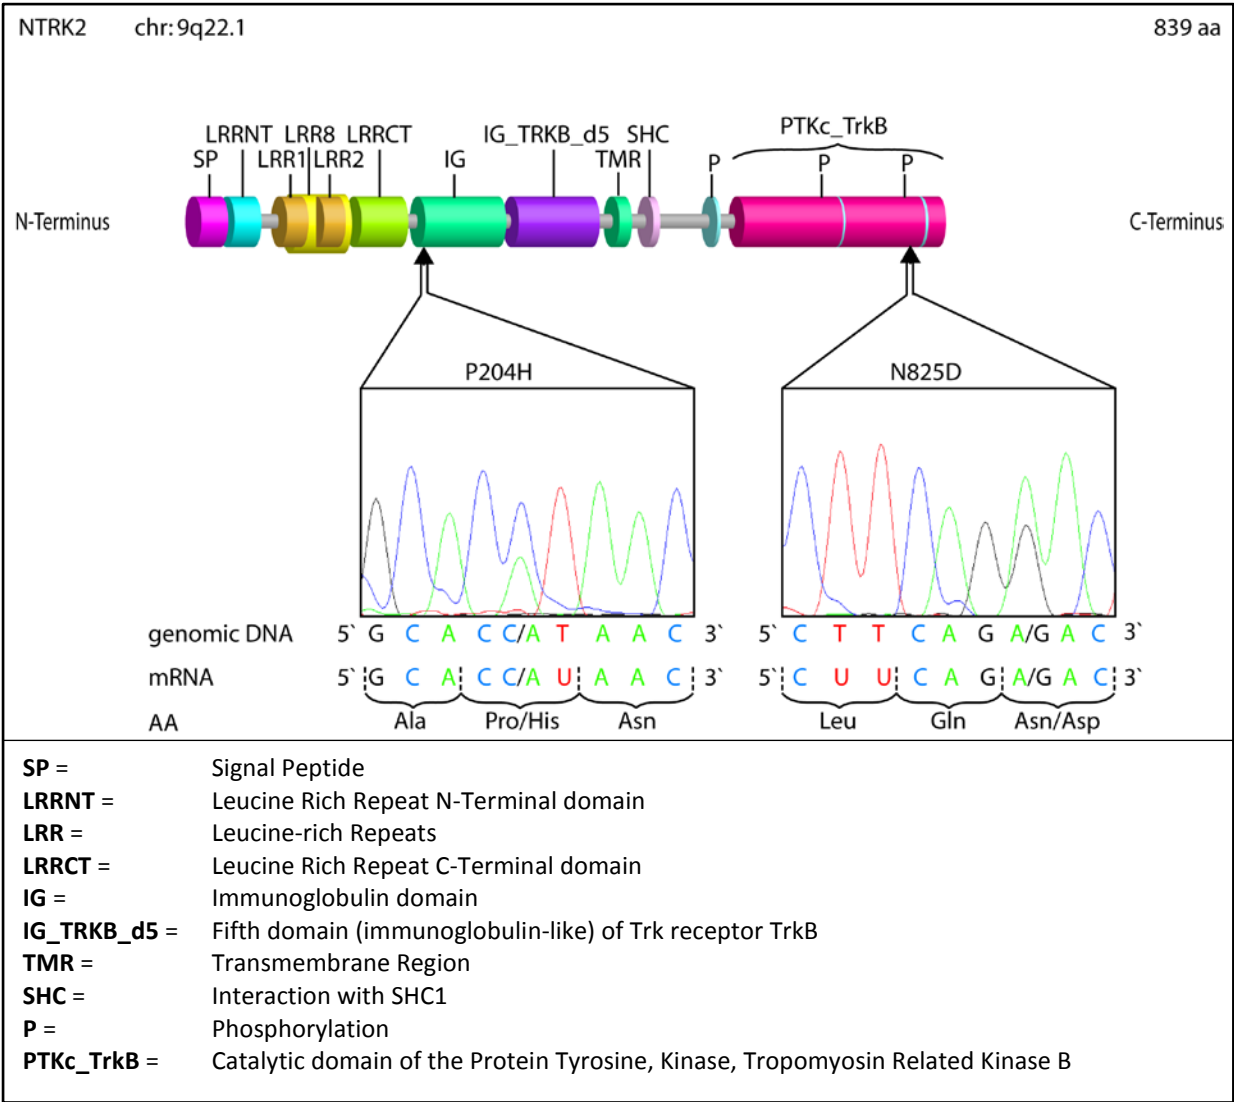

Supplement: bcj201247x1.pdf [file bcj201247x1.pdf]
